# Supplementary material for: Zwitterionic Polypeptoids: A Promising Class of Antifouling Bioinspired Materials
Source: MDPI journal article supplement (doi:10.3390/ma15134498), 2022-06-26
Supplement: s1 [file s1]

## Supporting Information

# Zwitterionic Polypeptoids: A Promising Class of Antifouling Bioinspired Materials

Jian Ding <sup>1,†</sup>, Xiangmin Ding <sup>1,†</sup> and Jing Sun <sup>2,\*</sup>

<sup>1</sup> College of Polymer Science and Engineering, Qingdao University of Science and Technology, Qingdao 266042, China; jinding1996@163.com (J.D.); minding1997@163.com (X.D.)

<sup>2</sup> State Key Laboratory of Supramolecular Structure and Materials College of Chemistry Jilin University, Changchun 130012, China

\* Correspondence: jingsun@jlu.edu.cn

† These authors contributed equally to this work.

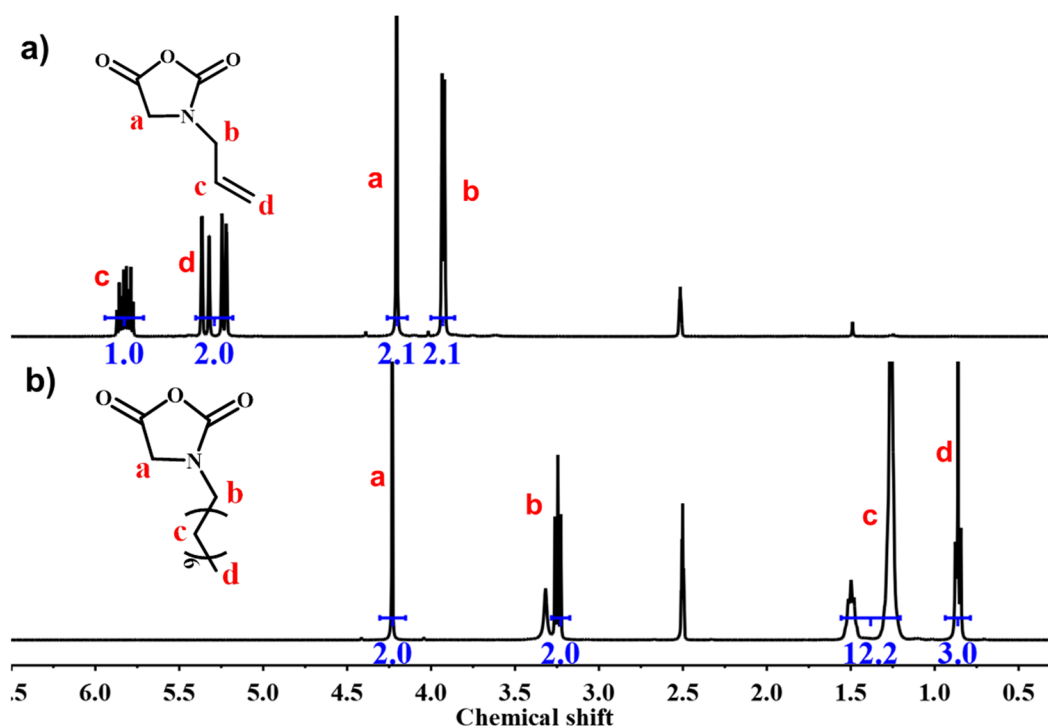

Figure S1. <sup>1</sup>H NMR spectra of (a) Allyl-NCA in DMSO and (b) Oct-NCA.

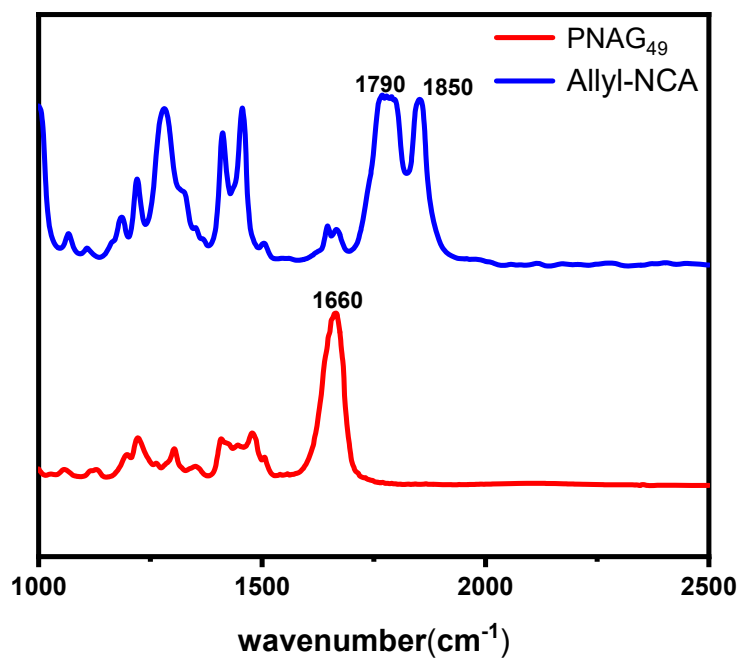

**Figure S2.** FTIR spectra of Allyl-NCA and PNAG<sub>49</sub>.

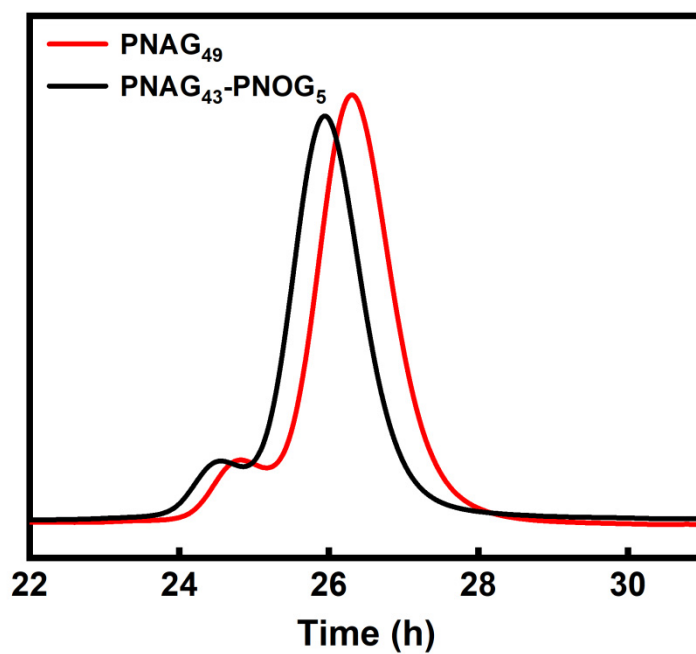

**Figure S3.** GPC chromatograms of the polymers. The molecular characteristics are shown in Table 1.

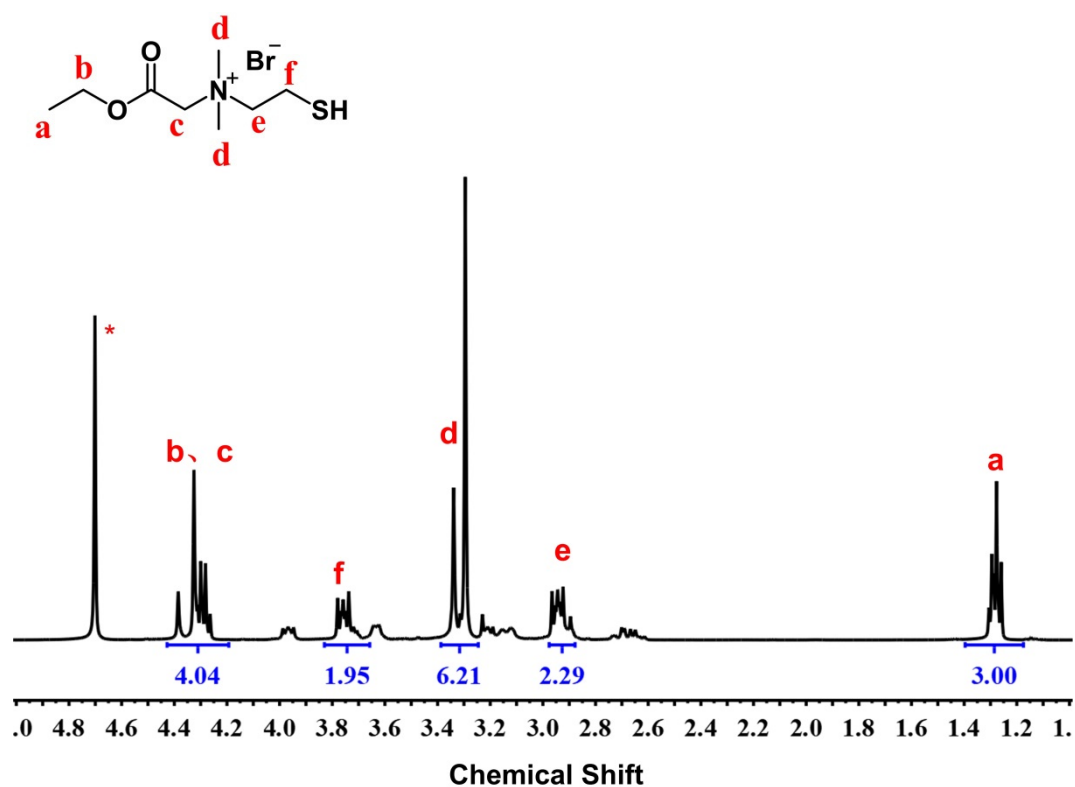

**Figure S4.** <sup>1</sup>H NMR spectra of 2-ethoxy-*N*-(2-mercaptoethyl)-*N,N*-dimethyl-2-oxoethan-1-aminium bromide. (\*) indicates DMSO).
